# Supplementary material
Source: publisher figshare collection journal article supplement (https://tandf.figshare.com/ndownloader/files/35462810)
Supplement: Supplementary file 1 [file 35462810]

## Sheet: ALL for Appendix 
	Floral source(s)			Classification		Biodiversity region (IBRA)		Physicochemical parameters						Anti-oxidant activity		Hydrogen peroxide					Antibacterial		Minimum inhibitory concentrations					OD at 30% honey/ OD at 0%
Sample Code	As provided by beekeeper	Common name	Based on HPTLC Fingerprint	Family	Tribe	Region	Subregion	pH	Refractive Index (nD20)	Brix	Colour before filtration	Colour after filtration	Total Phenolics (GA eq.mg /100g)	µmol TE/kg at 2 hrs	Antioxidants (mmol Fe/kg)	1h (µM)	2 hours	4 hours	6 hours	24 hours	Antibacterial Activity Value	Phenol Equivalence	S. aureus ATCC 292123	E. coli ATCC 25922	E. faecalis ATCC 29212	P. aeruginosa ATCC 27853	Mean MIC	S. aureus ATCC 292123	E. coli ATCC 25922	E. faecalis ATCC 29212	P. aeruginosa ATCC 27853
ACA-100	Acacia and B. sessilis					SWA	Perth	4.8	1.49765	82.6	320.2	217.033	31.7599	1695.7	3.32227	1.68576	1.04779	26.2559	44.2544	12.4562	145	0	32	30	32	26	30	0.596378	0.1483	0.729608	0.086631
PEP-264	Agonis flexuosa	Peppermint	A. flexuosa	Myrtaceae	Leptospermeae	No Data	No Data	4.53333	1.49575	81.9	589.85	337.55	36.3968	2061.11	5.80868	0.684182	2.32854	-0.030122	1.30375	3.4122	297	0	26	30	30	21	26.75	0.00116921	0.00755699	0.110462	0.000626623
PEP-039	Agonis flexuosa	Peppermint	A. flexuosa	Myrtaceae	Leptospermeae	ESP	Fitzgerald	4.97	1.4984	82.95	379	259.1	38.7907	1343.88	4.42356	0	0	0	0	0	223	0	32	30	32	25	29.75	0.1759	0.02705	0.1901	0
PEP-038	Agonis flexuosa	Peppermint	A. flexuosa	Myrtaceae	Leptospermeae	JAF	Southern Jarrah Forest	4.9	1.5008	83.85	496.3	306.233	42.6389	1522.7	5.0387	0	0	0	0	0	278.5	0	26	30	30	22	27	0	0.0041	0.0667	0
PEP-190	Agonis flexuosa	Peppermint	A. flexuosa	Myrtaceae	Leptospermeae	JAF	Southern Jarrah Forest	4.695	1.49615	82.05	560.567	310.433	42.3568	2426.35	5.65077	0	0	0	0	0.317828	293	0	27	30	32	24	28.25	0.010022	0.01	0.138236	0.00103837
PEP-260	Agonis flexuosa	Peppermint	A. flexuosa, mixed	Myrtaceae	Leptospermeae	JAF	Southern Jarrah Forest	4.87	1.4988	83.1	643.95	369.8	30.2154	1228.96	4.45384	17.2875	16.9139	8.49601	5.78178	2.84586	261	0	32	32	32	22	29.5	0.0464215	0.0127534	0.30521	0
PEP-310	Agonis flexuosa	Peppermint	A. flexuosa, diluted	Myrtaceae	Leptospermeae	JAF	Southern Jarrah Forest	4.325	1.4963	82.1	548.15	309.3	30.0505	1634.63	4.91909	0	5.27034	0	0	0	271	0	32	32	32	24	30	0.118774	0.032731	0.214092	0
PEP-240	Agonis flexuosa	Peppermint	A. flexuosa, diluted	Myrtaceae	Leptospermeae	SWA	Perth	4.62	1.5005	83.7	529.2	301.4	33.9416	1453.34	3.69224	6.91527	3.47797	2.10494	0.480871	8.82654	330.5	14.3143	21	29	32	20	25.5	0.098583	0	0.2064	0
PEP-191	Agonis flexuosa	Peppermint	A. flexuosa, diluted	Myrtaceae	Leptospermeae	No Data	No Data	4.305	1.4917	80.3333	397.4	222.733	37.2942	1982.87	4.40997	8.87603	1.70464	0.578273	0.512016	0.663602	373	2.22716	23	30	30	18	25.25	0.00283041	0.00413577	0.0383945	0.00223946
PEP-350	Agonis flexuosa	Peppermint	A. flexuosa, mixed	Myrtaceae	Leptospermeae	No Data	No Data	4.87	1.4989	83.1	692.75	469.75	31.5001	1823.83	4.18504	9.21165	10.8857	1.45307	-0.17536	0	312.5	0	26	30	32	20	27	0	0	0.221396	0
BAN-229	Banksia		B. menziesii	Proteaceae		SWA	Dandaragan Plateau	4.76	1.504	85.05	423.033	291.833	28.7279	1433.77	3.26987	22.6669	48.4087	86.0537	112.856	105.269	505	15.6186	6	15	30	14	16.25	0	0	0	0
BAN-080	Banksia		B. menziesii	Proteaceae		SWA	Perth	4.895	1.499	83.15	236.333	147.967	22.7666	724.607	2.85042	21.0073	36.5712	37.4367	26.797	1.75901	217	0	32	27	32	20	27.75	0.292764	0	0.520154	0
BAG-023	Banksia grandis	Bull banksia	(Consistent with B. menziesii)	Proteaceae		GES	Lesueur Sandplain	4.93	1.49895	83.1	275.433	177.233	31.3562	837.709	2.87918	41.9801	93.0055	148.248	288.29	99.2385	391	23.7832	8	19	32	22	20.25	0	0	0.46095	0
BAM-042	Banksia menziesii		B. menziesii, possibly mixed	Proteaceae		SWA	Perth/Dandaragan Plateau	4.61333	1.49655	82.2	308.267	265.733	27.427	1350.99	3.22297	62.2797	55.1531	58.2617	119.536	3.108	390	12.4442	12	19	32	23	21.5	0	0	0.2115	0
BAM-081	Banksia menziesii		B. menziesii, possibly mixed	Proteaceae		SWA	Perth	4.675	1.49445	81.4	450.667	149.533	31.0615	1166.59	3.39681	8.91884	7.54845	3.31813	8.44218	0	176	0	32	32	32	27	30.75	0.533397	0.107449	0.594639	0
BAM-082	Banksia menziesii		B. menziesii	Proteaceae		SWA	Perth	4.825	1.4988	83.1	256.2	161.267	23.7299	1118.99	2.73766	17.1417	12.5533	15.2345	14.391	7.74688	221	0	28	29	32	25	28.5	0.00103072	0	0.575622	0
BAM-083	Banksia menziesii		B. menziesii	Proteaceae		SWA	Perth	5.02	1.50257	84.5	200.133	122.567	23.4749	878.443	2.54275	58.0412	74.6117	139.777	187.244	102.968	308	0	18	25	32	20	23.75	0	0	0.534262	0
BAM-085	Banksia menziesii		B. menziesii, possibly mixed	Proteaceae		SWA	Perth	4.52	1.49625	82.1	243.567	135.267	23.2874	725.147	2.68857	9.75299	8.74009	9.45508	10.0211	1.19347	164.5	0	32	32	32	26	30.5	0.557775	0.0666832	0.94	0
BAM-087	Banksia menziesii		B. menziesii, possibly mixed	Proteaceae		SWA	Perth	4.165	1.4977	82.7	401.033	189.533	27.6161	699.516	2.61459	9.42529	16.9439	10.9148	15.0558	13.8198	214.5	0	32	30	32	22	29	0.313296	0.0181219	0.675568	0
BAM-099	Banksia menziesii		B. menziesii	Proteaceae		SWA	Perth	4.87	1.49813	82.8	206	119.7	22.0214	1013.26	2.49239	17.5554	22.8057	12.2477	7.65623	2.17654	120	0	32	32	32	29	31.25	0.739758	0.13595	0.990743	0.0597815
BAM-114	Banksia menziesii		B. menziesii	Proteaceae		JAF	Southern Jarrah Forest	4.86	1.4992	83.25	269.633	189.133	25.0352	1096.81	2.39034	22.849	57.6891	103.093	181.845	131.755	263.5	0	16	24	32	19	22.75	0.11703	0	0.508395	0
BAM-115	Banksia menziesii		B. menziesii	Proteaceae		SWA	Perth	4.855	1.49995	83.5	224.433	121.433	22.3541	522.679	2.32594	39.5727	52.9717	65.2484	64.3495	7.03833	204	0	30	30	32	22	28.5	0.00307566	0	0.535484	0.00265006
BAM-331	Banksia menziesii		Not consistent with B. menziesii	Proteaceae		SWA	Perth	4.475	1.49855	82.95	478.35	280.6	30.8489	1862.73	4.36447	0.145284	0	0.452052	2.11371	0	259	0	32	30	32	24	29.5	0.175799	0.00484099	0.335164	0.00349986
BAN-016	Banksia menziesii and Yate		B. menziesii, possibly mixed	Proteaceae		SWA	Perth	4.44333	1.4965	82.2	525.533	171.1	35.1715	2405.98	4.25041	28.7847	32.9892	25.621	9.66103	2.42494	172	38.1698	32	29	32	29	30.5	0.4936	0	0.3271	0.03145
BAP-056	Banksia prionotes	Acorn Banksia	Indeterminate	Proteaceae		SWA	Perth	4.335	1.49857	83	370	118.967	23.282	951.063	2.66107	0	0	0	0	0	163.5	0	32	32	32	26	30.5	0.507663	0.0880807	0.659101	-0.00363209
BAS-079	Banksia sessilis		B. sessilis	Proteaceae		GES	Lesueur Sandplain	4.99	1.5024	84.4	273.6	189.9	33.8332	935.971	3.06375	43.9006	77.3945	119.051	423.868	702.108	432.5	13.347	9	18	32	16	18.75	0	0	0.272477	0
BAS-098	Banksia sessilis		B. sessilis	Proteaceae		SWA	Perth	4.945	1.49983	83.4667	281.4	184.5	32.5199	1187.94	3.30343	42.1682	60.7112	93.5209	150.197	94.7724	242.5	0	19	25	32	20	24	0.142017	0.0955386	0.955537	0.0740954
BAS-088	Banksia sessilis		B. sessilis	Proteaceae		SWA	Perth	5.03	1.50085	83.85	340.8	224	38.1678	1037.25	3.79172	73.1159	90.4221	167.582	228.84	542.625	373.5	14.8376	11	18	32	15	19	0	0	0.320252	0
BAS-104	Banksia sessilis		B. sessilis	Proteaceae		SWA	Perth	4.955	1.4988	83.1	375.2	255.167	37.6714	1613.28	3.92631	49.7948	78.4476	187.23	314.723	738.187	428	15.7491	9	17	30	14	17.5	0	0	0	0
BAS-108	Banksia sessilis		B. sessilis	Proteaceae		SWA	Perth	5.045	1.49595	82	323.733	201.5	32.6031	806.75	3.04654	0	4.37192	16.6732	31.5151	48.7125	170	0	32	30	32	22	29	0.432662	0	0.793901	0
BAS-249	Banksia sessilis		B. sessilis	Proteaceae		GES	Lesueur Sandplain	4.79667	1.4987	83.05	311.9	175.05	23.7454	913.251	2.11354	99.3673	150.446	151.616	137.72	8.76211	379	24.2313	13	22	32	17	21	0	0	0.308935	0
BAS-243	Banksia sessilis		B. sessilis, mixed	Proteaceae		SWA	Perth	4.59667	1.49675	82.3	465.05	210	25.6374	1108.27	2.60156	23.1345	22.8232	11.9567	5.27321	2.57714	298.5	10.9597	20	27	32	19	24.5	0	0	0.421313	0
BAS-006	Banksia sessilis		B. sessilis, mixed	Proteaceae		SWA	Perth	4.46333	1.49635	82.15	337.467	203.267	29.9604	845.913	3.27201	72.8424	135.543	182.428	190.858	30.1016	451	29.9621	18.4	16	30	17	20.35	0	0	0	0
BAS-318	Banksia sessilis		Not consistent with B. sessilis	Proteaceae		SWA	Perth	5.36667	1.4947	81.55	215.55	114.15	15.8666	716.242	2.88724	94.6552	101.974	172.594	197.84	37.0877	456	19.2238	6	16	30	16	17	0	0	0	0
BAS-311	Banksia sessilis		Not consistent with B. sessilis	Proteaceae		SWA	Perth	4.595	1.49385	81.2	838.4	269.7	27.1932	936.266	4.59105	0	0	0.651725	5.47912	24.1519	182.5	0	32	32	32	25	30.25	0.394272	0.0578501	0.536009	0
BAS-107	Banksia sessilis, Acacia		B. sessilis, mixed	Proteaceae		SWA	Perth	4.81	1.4976	82.6	327.233	197.333	31.0477	1217.75	2.82518	26.4859	60.7231	88.3223	194.613	61.6003	231.5	0	26	28	32	22	27	0	0	0.586365	0
BAS-112	Banksia sessilis, Acacia		B. sessilis	Proteaceae		SWA	Perth	4.92	1.50043	83.6667	340.433	234.567	37.1241	1551.76	3.45791	50.5572	75.7102	125.41	263.808	526.432	376.5	15.3697	10	17	32	14	18.25	0	0	0.333537	0
BAS-109	Banksia sessilis, Acacia		Not consistent with B. sessilis	Proteaceae		SWA	Perth	4.75	1.4953	81.75	407.733	264.2	32.9244	1340.4	3.37212	0	1.88722	2.4916	7.76319	0	181	0	32	32	32	26	30.5	0.511872	0.080156	0.427096	0
BAS-084	Banksia sessilis, Capeweed		B. sessilis, mixed	Proteaceae		SWA	Perth	4.92	1.49945	83.35	367.233	260.1	36.9977	1022.26	3.84123	2.81168	0	1.38172	1.32213	0	157.5	2.82784	32	30	32	25	29.75	0.511683	0.0392889	0.57647	0
BAN-005	Banksia sessilis, Wildflower		B. sessilis	Proteaceae		SWA	Perth	4.57333	1.49805	82.8	281.467	107.8	22.1984	880.406	2.17197	0	7.35253	17.0676	32.503	38.9448	155	0	32	32	32	30	31.5	0.496	0.09685	0.5036	0.0382
BAV-048	Banksia victoriae		Indeterminate	Proteaceae		SWA	Perth/Dandaragan Plateau	4.77	1.4958	81.9	311.267	116.633	28.9145	1951.8	3.76141	72.9186	81.8821	116.864	288.735	169.643	172	10.7471	32	30	32	28	30.5	0.36805	0	0.60075	0.00765
CAL-176	Callistemon	Bottlebrush	Indeterminate	Myrtaceae	Melaleuceae	GES	Geraldton Hills	4.85	1.50157	84.1	401.367	258.033	34.3893	1386.18	3.5657	37.2621	58.66	114.138	131.137	31.3418	482.5	20.7375	7	15	30	13	16.25	0	0	0	0
CAL-238	Callistemon	Bottlebrush	Indeterminate	Myrtaceae	Melaleuceae	SWA	Perth	4.43667	1.49855	83	545.2	282.8	32.5894	1214.47	3.60222	2.82224	7.28845	11.3093	8.95481	2.19588	391	19.7512	11	20	32	16	19.75	0.167086	0	0.259145	0
CAL-319	Callistemon	Bottlebrush	Indeterminate	Myrtaceae	Melaleuceae	GES	Lesueur Sandplain	4.87333	1.50165	84.15	363.5	243.25	22.9505	1178.68	4.14098	49.8019	46.6008	66.5231	55.8567	2.67979	501.5	22.7432	7	14	30	17	17	0	0	-0.0136915	-0.00579093
CAL-317	Callistemon	Bottlebrush	Indeterminate	Myrtaceae	Melaleuceae	No Data	No Data	4.24	1.4947	81.55	1062.45	653.7	41.2632	2717.32	7.46856	0	0	0	0	0.47944	368	0	24	26	32	16	24.5	0	0	0.0555861	0
CAL-021	Callistemon	Bottlebrush	Indeterminate	Myrtaceae	Melaleuceae	SWA	Perth	4.26333	1.49355	81.1	354.533	176.633	27.4151	1237.72	2.74687	74.6323	135.697	146.816	140.775	2.03729	313.5	35.9655	32	26	32	18	27	0.3804	0	0.28725	0
CAL-040	Callistemon	Bottlebrush	Indeterminate	Myrtaceae	Melaleuceae	SWA	Perth	4.16333	>1.5040	>85.0	329.2	213.467	33.1023	1960.79	4.7975	0	0	0	0	0	364.5	2.46811	13	29	32	20	23.5	0	0	0.10495	0
CAL-330	Callistemon	Bottlebrush	Indeterminate	Myrtaceae	Melaleuceae	SWA	Perth	4.695	1.49815	82.85	603.25	411.7	38.7149	2841.58	7.23358	3.305	5.05126	20.5454	24.0594	0.728555	616.5	38.2981	4	10	16	8	9.5	0	0	0	0
CAL-041	Callistemon, Agonis flexuosa	Bottlebrush	Indeterminate	Myrtaceae	Melaleuceae	SWA	Perth	4.39667	1.49985	83.5	353.533	182.2	35.6917	1783.5	4.54421	0	0	0	0	0	228	0	32	30	32	25	29.75	0.16005	0.0407	0.13695	0
RED-134	Calothamnus	Red Bell	Calothamnus, diluted	Myrtaceae	Melaleuceae	No Data	No Data	4.14333	1.49585	81.95	788.367	485.2	65.7034	4848.66	11.0224	0.188393	2.10446	3.38872	8.11937	5.57845	530.5	27.7456	8	12	28	12	15	0	0	0	0
RED-166	Calothamnus	Red Bell	Calothamnus, diluted	Myrtaceae	Melaleuceae	No Data	No Data	4.115	1.49655	82.25	863.5	513.467	75.5639	5407.76	11.6605	0	0	1.32459	4.53295	4.09906	588	30.7032	6	11	25	10	13	0	0	0	0
RED-086	Calothamnus	Red Bell	Calothamnus	Myrtaceae	Melaleuceae	SWA	Perth	4.475	1.49815	82.85	663.8	464.967	59.6316	3674.86	9.74886	4.79461	7.67358	22.2072	39.2702	236.316	557	21.4439	5	11	24	11	12.75	0	0	0	0
RED-106	Calothamnus	Red Bell	Calothamnus	Myrtaceae	Melaleuceae	SWA	Perth	4.665	1.49905	83.2	658.233	451.367	53.6464	3022.61	7.30547	0.383673	5.89939	23.6071	60.3653	513.604	540.5	23.0352	6	13	28	12	14.75	0	0	0	0
RED-255	Calothamnus	Red Bell	Calothamnus, mixed	Myrtaceae	Melaleuceae	SWA	Perth	4.58667	1.5014	84.05	662.3	509.45	60.0149	3719.46	9.56135	2.5968	3.04012	25.6124	62.0966	1023	546	26.4005	5	11	23	10	12.25	0	0	0	0
RED-095	Calothamnus	Red Bell	Calothamnus	Myrtaceae	Melaleuceae	SWA	Perth	4.32	1.4977	82.6	729.567	471.8	61.4717	4598.29	10.2521	5.4035	3.28834	5.25455	2.66273	0.989735	551	24.7596	5	11	27	10	13.25	0	0	0	0
RED-101	Calothamnus	Red Bell	Calothamnus	Myrtaceae	Melaleuceae	SWA	Perth	4.7	1.4973	82.5	568.6	417.833	54.5793	3074.69	7.78734	0	2.64164	21.879	62.8838	787.74	318	23.0868	7	16	30	14	16.75	0.189081	0.156217	0.340485	0.104652
RED-102	Calothamnus	Red Bell	Calothamnus	Myrtaceae	Melaleuceae	SWA	Perth	4.62	1.49937	83.2667	554.5	390.067	48.0865	2454.08	6.76327	2.98507	8.80408	9.13985	14.8479	8.94713	317.5	14.3941	8	15	30	14	16.75	0.179219	0.149102	0.344214	0.0997617
RED-103	Calothamnus	Red Bell	Calothamnus	Myrtaceae	Melaleuceae	SWA	Perth	4.24	1.4972	82.45	725.633	433.167	56.5211	3927.53	9.36216	0	0	7.38519	0	0	388.5	9.96936	23	25	32	16	24	0	0	0.0779252	0
RED-332	Calothamnus	Red Bell	Calothamnus	Myrtaceae	Melaleuceae	SWA	Perth	4.69	1.49875	83.05	804.7	602.6	41.8848	2882.79	7.35503	4.37489	7.70746	16.2444	21.5638	27.7761	578	26.7506	5	12	24	10	12.75	0	0	0	0
CAN-312	Canola*	Brassica napus	Indeterminate	Brassicaceae		GES	Lesueur Sandplain	4.215	X	X	120	32.25	7.38981	255.456	1.37195	116.402	283.508	500.52	701.529	792.338	176.5	0	32	32	32	27	30.75	0.503736	0.0559836	0.626391	0.00203476
CAN-057	Canola*	Brassica napus	Indeterminate	Brassicaceae		JAF	Northern Jarrah Forest	4.215	1.49535	81.75	369.733	170.833	27.034	1535.26	3.31062	6.83887	6.20984	1.30224	5.05897	5.09743	339.5	0	19	26	32	20	24.25	-0.00923311	-0.0061204	0.271335	-0.00779619
CAN-072	Canola*	Brassica napus	Indeterminate	Brassicaceae		GES	Geraldton Hills	3.94	1.48945	79.5	253.767	80.5	20.3544	736.812	2.55339	1.56363	9.79697	0.714979	0	0	224	6.67556	32	30	32	20	28.5	0.29291	0.00840228	0.40907	0.000712822
CAP-136	Capeweed*	Arctotheca calendula	Indeterminate	Asteraceae		GES	Lesueur Sandplain	4.68	1.49605	82.05	542.567	44.7667	15.7408	358.83	1.48813	0.344043	25.7453	95.6496	193.571	1593.7	177.5	0	32	29	32	29	30.5	0.586356	0	0.582666	0
CHA-197	Chamelaucium		Indeterminate	Myrtaceae	Chamelaucieae	SWA	Perth	4.415	1.49605	82	396.733	218.867	32.8698	1802.81	4.44296	4.9691	4.83928	0.424859	2.76079	0	443.5	17.8973	18	26	32	14	22.5	0	0	0.0439437	0
BLO-141	Corymbia zygophylla	Bloodwood	Indeterminate	Myrtaceae	Eucalypteae	DAL	Pindanland	4.09	1.4947	81.5	584.433	179.167	29.2122	1521.69	3.01755	31.8171	49.0867	40.0827	41.6112	9.98884	222	23.1445	32	30	32	23	29.25	0.267039	0.0050795	0.317832	0
EUC-286	Eucalyptus		Indeterminate	Myrtaceae	Eucalypteae	SWA	Perth	4.47	1.50015	83.55	415.75	196.1	25.1188	1595.88	4.90369	10.9031	0.86341	1.73896	0	0	316	20.087	28	28	32	17	26.25	0.0480257	0	0.227953	0
FLO-241	Eucalyptus rudis	Flooded Gum	Indeterminate	Myrtaceae	Eucalypteae	SWA	Perth	4.34	1.49625	82.1	482.85	249.1	34.2221	2117	4.64351	33.2448	31.7456	12.0402	1.43336	2.43464	567.333	34.1337	5	13	26	9	13.25	0	0	0	0
FLO-362	Eucalyptus rudis	Flooded Gum	Indeterminate	Myrtaceae	Eucalypteae	SWA	Perth	4.645	1.50125	84	259.15	131.35	20.0954	1446.64	3.41377	61.0589	76.4397	19.0511	3.2477	0	523.5	27.7206	4	15	32	11	15.5	0	0	0	0
BLA-297	Eucalyptus todtiana	Coastal Blackbutt	Indeterminate	Myrtaceae	Eucalypteae	SWA	Dandaragan Plateau	5.6	1.4974	82.55	581.8	411.3	25.6915	839.15	3.43165	147.498	356.198	567.96	563.099	78.6848	500.5	28.6476	4	22	29	10	16.25	0	0	0	0
BLA-301	Eucalyptus todtiana	Coastal Blackbutt	Indeterminate	Myrtaceae	Eucalypteae	JAF	Northern Jarrah Forest	5.18667	1.499	83.1	379.95	226.45	28.0964	2116.69	5.47237	165.003	434.305	817.029	1099.19	4.41133	647	47.8743	1	8	12	6	6.75	0	0	0	0
BLA-049	Eucalyptus todtiana	Coastal Blackbutt	Indeterminate	Myrtaceae	Eucalypteae	SWA	Perth/Dandaragan Plateau	4.885	1.4964	82.15	342.4	240.567	22.8194	477.198	1.82308	141.92	371.568	530.414	689.975	889.317	397.5	20.5836	12	28	30	13	20.75	0	0	0	0
BLA-129	Eucalyptus todtiana	Coastal Blackbutt	Indeterminate	Myrtaceae	Eucalypteae	SWA	Perth	4.72	1.49765	82.65	337.467	195.4	23.2011	833.15	1.4151	148.216	324.498	545.058	773.61	361.277	408	22.5244	12	26	30	15	20.75	-0.0179921	0	-0.020569	-0.00562075
BLA-091	Eucalyptus todtiana	Coastal Blackbutt	Indeterminate	Myrtaceae	Eucalypteae	SWA	Perth	4.43	1.49895	83.15	764.2	515.067	43.916	1901.77	4.4214	5.34392	5.34392	10.1105	4.30123	3.66975	360.5	0	13	25	32	19	22.25	0	0	0.0967585	0
BLA-092	Eucalyptus todtiana	Coastal Blackbutt	Indeterminate	Myrtaceae	Eucalypteae	SWA	Perth	4.47	1.49745	82.55	757.433	546.85	41.9396	713.338	3.23568	12.4044	4.98643	5.7312	4.30123	5.47186	208.5	0	32	30	32	26	30	0.183714	0	0.225816	0
BLA-105	Eucalyptus todtiana	Coastal Blackbutt	Indeterminate	Myrtaceae	Eucalypteae	SWA	Perth	4.205	1.49335	81	594.367	348.7	45.7559	1834.61	3.91929	0	3.94913	1.09729	16.7821	14.1346	495	14.8757	6	13	28	14	15.25	0	0	0	0
BLA-296	Eucalyptus todtiana	Coastal Blackbutt	Indeterminate	Myrtaceae	Eucalypteae	SWA / JAF	Perth/Northern Jarrah Forest	5.04	1.4977	82.65	405.45	247.3	27.0864	1749.66	5.35725	196.87	386.434	617.87	500.181	1.03437	647.5	45.2368	1	8	11	7	6.75	0	0	0	0
BLC-359	Eucalyptus todtiana	Coastal Blackbutt	Indeterminate	Myrtaceae	Eucalypteae	SWA	Perth	4.985	1.501	83.9	466.2	276.85	25.9802	1482.29	3.63036	99.6617	188.612	282.32	305.419	40.0527	597	34.0827	4	12	16	8	10	0	0	0	0
GRE-139	Grevillea wickhamii		Indeterminate	Proteaceae	Embothrieae	DAL	Pindanland	4.285	1.50215	84.35	156.7	51.4	15.2632	248.261	1.5061	117.83	232.951	325.935	393.082	13.3456	244	20.2533	23	28	32	26	27.25	0	0.00431088	0.491561	0
GRE-140	Grevillea wickhamii		Indeterminate	Proteaceae	Embothrieae	DAL	Pindanland	4.49	1.50267	84.5	263.233	108.7	18.2865	797.309	1.97962	32.2501	78.6687	137.97	317.59	141.987	178	5.47037	32	32	32	30	31.5	0.421	0.0713772	0.405671	0.00441174
LEP-268	Leptospermum nitens		Indeterminate	Myrtaceae	Leptospermeae	No Data	No Data	4.65333	X	X	309.1	76.25	15.875	410.37	2.01844	1.67454	5.25866	7.67118	3.40276	5.22449	173	0	32	30	32	29	30.75	0.389644	0.00324004	0.6438	0.000366992
LEP-335	Leptospermum sp.		Indeterminate	Myrtaceae	Leptospermeae	COO	Eastern Goldfields	5.42333	1.5034	84.85	303.15	169.3	21.0978	1099.15	3.51307	143.288	80.4358	69.5162	55.6166	8.36613	482	26.2164	5	23	29	12	17.25	0	0.00078225	0.00316331	0
LEP-336	Leptospermum sp.		Indeterminate	Myrtaceae	Leptospermeae	No Data	No Data	4.275	1.50005	83.55	1167.65	749.1	44.4462	2682.49	5.85904	0.266934	0.446095	1.64904	1.13715	1.75395	553.5	19.2065	6	24	27	10	16.75	0	0	0	0
LEP-168	Leptospermum sp.		Indeterminate	Myrtaceae	Leptospermeae	GES	Geraldton Hills	3.985	1.49467	81.5	556.767	161.6	35.2375	978.456	2.86339	5.94851	12.8447	24.0977	23.0679	20.2316	483	17.0798	8	12	22	20	15.5	0	0	0	0
LEP-321	Leptospermum sp.		Indeterminate	Myrtaceae	Leptospermeae	No Data	No Data	4.60333	1.49635	82.15	932.8	650.7	46.2114	3598.64	8.68922	0	0	0.0038405	1.29959	0	571	20.0751	4	14	20	12	12.5	0	0	0	0
LEP-314	Leptospermum sp.		Indeterminate	Myrtaceae	Leptospermeae	SWA	Perth	4.53	1.4984	82.9	590.55	417.75	36.2486	2346.68	7.24832	8.38458	7.37491	17.3079	33.4314	2.98537	595	32.6415	5	10	23	10	12	0	0	0	0
LEP-149	Leptospermum sp.		Indeterminate	Myrtaceae	Leptospermeae	SWA	Perth	4.09	1.49825	82.85	689.633	373.133	52.7277	3331.62	7.5731	3.85971	25.3642	71.1032	155.203	355.848	566	27.3734	6	12	22	10	12.5	0	0	0	0
LEP-150	Leptospermum sp.		Indeterminate	Myrtaceae	Leptospermeae	SWA	Perth	3.97	1.49685	82.3	587.5	242.067	41.2589	1830.55	3.72252	17.4367	65.5943	123.175	178.631	86.9359	489.5	22.1899	8	17	28	13	16.5	0	0	0	0
LEP-151	Leptospermum sp.		Indeterminate	Myrtaceae	Leptospermeae	SWA	Perth	4.065	1.49795	82.75	826.067	437.533	51.3708	2697.01	6.07095	0	2.39722	21.9744	39.8176	28.4606	488.5	21.4551	7	17	28	13	16.25	0	0	0	0
LEP-152	Leptospermum sp.		Indeterminate	Myrtaceae	Leptospermeae	SWA	Perth	3.985	1.49635	82.15	744.5	369.433	45.3157	2352.3	5.07218	0	0	0	0	2.16949	250.5	0	32	28	32	21	28.25	0.176818	0.000762374	0.229768	0
LEP-183	Leptospermum subtenue		Indeterminate	Myrtaceae	Leptospermeae	SWA	Perth	4.79	1.5002	83.6	247.1	143.233	21.6012	783.278	2.25337	9.45671	1.57213	0.876429	2.95128	5.473	196.5	0	32	32	32	27	30.75	0.375593	0.0412141	0.529351	0
LOP-199	Lophostemon confertus*		Indeterminate	Myrtaceae	Lophostemoneae	SWA	Perth	4	1.49923	83.2333	223.867	52.3	17.5696	559.03	1.79134	45.7569	36.7503	19.3065	18.3143	1.50571	179	0	32	32	32	28	31	0.401844	0.0898843	0.682289	0.000715751
LOP-200	Lophostemon confertus*		Indeterminate	Myrtaceae	Lophostemoneae	SWA	Perth	4.29667	1.49685	82.35	312.567	158	27.0933	1207.45	3.56073	1.13938	3.85491	1.38671	0.479822	0	206.5	0	32	32	32	24	30	0.297722	0.0464068	0.411535	0.000105374
MEL-137	Melaleuca alsophila		Indeterminate	Myrtaceae	Melaleuceae	DAL	Pindanland	4.13	1.49435	81.4	326.533	202.833	25.792	686.48	2.22306	116.453	230.851	216.823	212.991	63.3466	380	18.2273	15	22	32	17	21.5	0	0	0.29019	0
MEL-138	Melaleuca alsophila		Indeterminate	Myrtaceae	Melaleuceae	DAL	Pindanland	3.86	1.49235	80.65	407.367	188.667	30.5592	1169.68	3.19939	1.13152	0.951243	0.524757	1.1704	58.3693	284.5	0	28	27	32	21	27	0.00779086	0	0.231177	0.000212134
MEL-337	Melaleuca		Indeterminate	Myrtaceae	Melaleuceae	SWA	No Data	5.685	1.50063	83.7667	509.05	365.95	24.954	1476.51	4.37475	151.705	311.056	579.804	897.56	1047.92	643	42.1028	4	11	15	7	9.25	0	0	0	0
MEL-324	Melaleuca		Indeterminate	Myrtaceae	Melaleuceae	SWA	No Data	4.49	1.49555	81.85	510.65	285.25	26.281	2083.23	5.54675	7.13565	7.69123	0	0	3.35613	439.5	13.1081	8	25	32	15	20	0	0	0.13859	0
MEL-237	Melaleuca		Indeterminate	Myrtaceae	Melaleuceae	SWA	Perth	4.01333	1.49575	81.95	416.2	179.8	34.7987	1712.55	4.65449	53.7927	61.6267	69.5039	40.7624	3.52245	555.5	36.0025	5	20	25	9	14.75	0.00715322	0.000565691	0.00587474	0.000106191
MEL-235	Melaleuca		Indeterminate	Myrtaceae	Melaleuceae	DAL	Pindanland	3.87	1.49285	80.8	557.667	341.6	31.4379	1371.51	3.20931	14.1555	21.907	30.1508	33.46	27.515	473	0	8	20	27	14	17.25	0	0	0	0
MEL-060	Melaleuca		Indeterminate	Myrtaceae	Melaleuceae	SWA	Perth	4.49	1.4963	82.05	456	208.533	31.1283	1090.05	4.8745	144.418	106.25	53.8928	31.3113	3.90932	358	20.4483	19	23	32	16	22.5	0	-0.00933255	0.267495	-0.00573368
MUL-333	Multifloral		Indeterminate			SWA	Perth	4.55	1.49765	82.65	441.2	256.85	29.1767	1818.62	5.04303	8.36153	3.45436	4.08214	2.95649	0.727883	462	19.6919	6	25	30	12	18.25	0.00168805	0.00164937	0.0175713	0.00154669
COA-077	Multifloral (Spring coastal)		Indeterminate			SWA	Perth	4.27	1.4949	81.6	694.267	469.867	51.0465	2731.03	7.70988	1.31559	7.00219	16.3942	104.137	16.9338	580	25.7227	5	14	22	10	12.75	0	0	0	0
COA-067	Multifloral (Spring coastal)		Indeterminate			GES	Lesueur Sandplain	4.405	1.50265	84.5	609.7	317.267	51.0728	1413.08	4.97514	1.33828	14.2905	13.0934	3.32486	1.65652	410	16.0006	18	24	32	18	23	0	0	0.170156	0
COA-070	Multifloral (Spring coastal)		Indeterminate			GES	Lesueur Sandplain	4.42	1.49605	82	592.533	323.633	50.527	1657.64	4.91516	6.68088	17.8861	8.04744	1.93138	2.9752	324.75	17.2498	32	25	32	18	26.75	0.234216	0	0.380589	0
SPR-326	Multifloral (Spring)	Spring	Indeterminate			No Data	No Data	4.52667	1.4925	80.7	735.05	491.85	30.7722	2190.76	5.44045	0	0	0	0	0	200	0	32	32	32	24	30	0.313113	0.074359	0.445188	0.000156838
SPR-024	Multifloral (Spring)	Spring	Indeterminate			GES	Geraldton Hills	4.22667	1.49485	81.55	307.933	69.0667	19.1615	659.492	1.99699	6.06806	-0.106218	6.97012	5.12372	0	126.5	0	32	32	32	32	32	0.52705	0.14485	0.67725	0.2278
SPR-116	Multifloral (Spring)	Spring	Indeterminate			SWA	Perth	4.80667	1.4971	82.4	363.667	229.55	31.5787	1438.31	3.15154	9.98209	32.1548	68.9129	91.065	66.1275	193	0	32	30	32	23	29.25	0.448112	0	0.697097	0
MUL-188	Multifloral (urban)		Indeterminate			SWA	Perth	4.695	1.49535	81.75	279.467	141.2	26.9181	1336.44	3.19055	2.86414	0	1.47274	1.73777	1.53545	244.5	0	32	32	32	21	29.25	0.180888	0.0258275	0.426579	0.000224568
MUL-196	Multifloral (urban)		Indeterminate			SWA	Perth	4.205	1.49485	81.55	428.733	255.333	35.3901	1615.12	4.69491	-0.0423265	0.04211	0.0126365	0.45234	0	442	17.496	23	25	30	12	22.5	0	0	0.00999451	0
WIL-010	Multifloral (Wildflower)	Wildflower	Indeterminate			GES	Lesueur Sandplain	4.50333	1.49745	82.6	330.7	197.4	28.8407	813.617	2.10192	34.6503	44.1572	33.9753	21.2683	9.51344	174	0	32	32	32	27	30.75	0.29445	0.08955	0.32115	0
WIL-130	Multifloral (Wildflower)	Wildflower	Indeterminate			SWA	Perth	4.28	1.49575	81.9	348.533	153.7	25.4921	1005.82	2.70808	2.11538	0	0	-0.242931	3.51107	151	0	32	32	32	30	31.5	0.465901	0.132433	0.633267	0.00769718
WIL-144	Multifloral (Wildflower)	Wildflower	Indeterminate			GES	Lesueur Sandplain	4.275	1.4927	80.75	435.467	162.233	41.4688	3485.63	6.76738	13.195	43.3441	70.5022	85.644	5.92738	577	27.2695	6	13	20	11	12.5	0	0.000415053	0	0.000266596
NUY-189	Nuytsia floribunda	Christmas tree	Indeterminate			SWA	Dandaragan Plateau	4.44	1.5008	83.8333	303.033	66.8667	18.2616	640.008	1.77601	1.57213	11.3726	9.73598	5.99849	18.4946	164	0	32	32	32	30	31.5	0.405006	0.0388279	0.992179	0
SCH-177	Scholtzia		Indeterminate	Myrtaceae	Chamelaucieae	SWA	Perth	4.025	1.4907	80	1120.2	697.3	53.9936	3076.42	6.20741	0	0	0	0	2.0467	258	0	32	30	30	24	29	0.114985	0.0430996	0.0340436	0.000829703
SCH-014	Scholtzia involucrata		Indeterminate	Myrtaceae	Chamelaucieae	SWA	Perth	4.18667	1.475	73.8667	968.867	621.3	66.967	3120.91	6.62181	1.09434	0	0	0	0.31457	243.5	0	32	28	30	25	28.75	0.08385	0.005	0.00215	0.0011
TAX-198	Taxandria linearifolia		Indeterminate	Myrtaceae	Leptospermeae	SWA / JAF	Perth/Northern Jarrah Forest	4.38333	1.5011	83.9	610.533	342.667	40.6452	2598.32	6.44163	0	0	0	0	0	413	0	18	27	32	14	22.75	0	0	0.0271912	0
COMPARATOR HONEYS
CON-ACT	Leptospermum	Activon brand						3.995	X	X	1603.87	818.367	ND	4344.73	10.7225	0	0	0	0	0	517.5	0	9	12	20	16	14.25	0.00085	0.0011	0.0054	0.00045																0
CON-PAS	Multifloral	Capilano brand						4.235	1.497	82.4	430.833	208.633	ND	1559.79	3.99293	0	0	0	0	0	148	0	32	29	32	25	29.5	0.38	0.095	0.395	0																0
CON-ART	Artificial							5.725	1.4914	80.25	33.3333	43.8	ND	0	0.751733	0	0	0	0	0	194	0	32	32	32	28	31	0.468731	0.0997251	0.691456	0.00515805																0
			Indeterminate due to low numbers of samples.			Shaded:	Not within a coastal bioregion		X = off-scale				ND: Not done
